# Supplementary material for: Predicting Cost‐Effectiveness of Generic vs. Brand Dabigatran Using Pharmacometric Estimates Among Patients with Atrial Fibrillation in the United States
Source: PubMed Central journal article supplement — Clin Transl Sci. 2020 Feb 13;13(2):352–61. doi: 10.1111/cts.12719 (PMC7070788; doi:10.1111/cts.12719), 2020-02-13
Supplement: CTS-13-352-s001.pdf [file CTS-13-352-s001.pdf]

## SUPPLEMENTARY MATERIALS

Table S1. Complete list of input parameters, their distributions and data source

| Model parameter                                                                              | Base case | Range (one-way sensitivity analysis) | Data source |
|----------------------------------------------------------------------------------------------|-----------|--------------------------------------|-------------|
| <b>Cost</b>                                                                                  |           |                                      |             |
| Dabigatran (brand name), monthly                                                             | 296.23    | NA                                   | (1, 2)      |
| Dabigatran (generic), monthly                                                                | 257.72    | (62.21-257.72)                       | (1-3)       |
| Aspirin, monthly                                                                             | 0.64      | (0.16-6.42)                          | (4)         |
| Event cost of minor stroke                                                                   | 19639.40  | (17453-21816.84)                     | (5)         |
| Monthly cost of minor stroke                                                                 | 840.05    | (219.05-1461.05)                     | (5)         |
| Event cost of major stroke                                                                   | 31045.69  | (27588.36-34503.02)                  | (5)         |
| Monthly cost of major stroke                                                                 | 1327.75   | (345.11-2309.36)                     | (5)         |
| Event cost of RIND event                                                                     | 11802.03  | (10488.74-13117.39)                  | (5)         |
| Event cost of ICH                                                                            | 47790.90  | (34252.97-61330.89)                  | (5)         |
| Monthly cost of ICH                                                                          | 3099.82   | (162.22-6036.38)                     | (5)         |
| Monthly cost of stroke and ICH                                                               | 3935.73   | (206.65-7665.84)                     | (5)         |
| Event cost of ECH                                                                            | 15658.20  | (13300.28-18015.1)                   | (5)         |
| Event cost of minor bleeding                                                                 | 44.43     | (0-216.99)                           | (4)         |
| Event cost of MI                                                                             | 34368.69  | (30831.80-37906.62)                  | (5)         |
| Monthly cost of MI                                                                           | 586.90    | (551.77-1930.15)                     | (5)         |
| Event cost of nonevent death                                                                 | 6469.32   | (3796.24-8134.95)                    | (4)         |
| <b>Utility</b>                                                                               |           |                                      |             |
| Healthy on dabigatran (Annual)                                                               | 0.994     | (0.975-1)                            | (6)         |
| Healthy on aspirin (Annual)                                                                  | 0.998     | (0.994-1)                            | (7)         |
| Disutility of major neurologic event (Annual)                                                | -0.61     | (-1-0)                               | (7)         |
| Disutility of minor neurologic event (Annual)                                                | -0.24     | (-1-0)                               | (7)         |
| Disutility of Non-ICH bleed event (Annual)                                                   | -0.16     | (-0.3-0)                             | (8)         |
| Disutility of MI (Annual)                                                                    | -0.16     | (-0.3-0)                             | (9)         |
| <b>Transition Probabilities</b>                                                              |           |                                      |             |
| Baseline rate of minor bleeding on warfarin for patients in low bleed risk category (%/year) | 8.089     | ---                                  | (10)        |

|                                                                                                 |        |             |            |
|-------------------------------------------------------------------------------------------------|--------|-------------|------------|
| Baseline rate of minor bleeding on warfarin for patients in medium bleed risk category (%/year) | 10.091 | ---         | (10)       |
| Baseline rate of minor bleeding on warfarin for patients in high bleed risk category (%/year)   | 14.452 | ---         | (10)       |
| Hazard ratio of minor bleeding comparing brand dabigatran to warfarin                           | 0.91   | (0.85-0.97) | (11)       |
| Relative risk of minor bleeding comparing aspirin to warfarin                                   | 0.63   | (0.32-1.22) | (12)       |
| Baseline rate of stroke on warfarin for patients in low stroke risk category (%/year)           | 0.949  | ---         | IBM        |
| Baseline rate of stroke on warfarin for patients in medium stroke risk category (%/year)        | 1.424  | ---         | IBM        |
| Baseline rate of stroke on warfarin for patients in high stroke risk category (%/year)          | 2.555  | ---         | IBM        |
| Hazard ratio of stroke comparing brand dabigatran to warfarin                                   | 0.76   | (0.6-0.98)  | (11)       |
| Relative risk of stroke comparing aspirin to warfarin                                           | 2.08   | (1.59-2.7)  | (13)       |
| Proportion of fatal ischemic stroke with dabigatran (%)                                         | 8.2    | (8.2-10.1)  | (4, 14-17) |
| Proportion of major ischemic stroke with dabigatran (%)                                         | 40.2   | (40.2-41.7) |            |
| Proportion of minor ischemic stroke with dabigatran (%)                                         | 42.5   | (34.8-42.5) |            |
| Proportion of ischemic stroke with no residual deficit with dabigatran (%)                      | 9.1    | (9.1-13.3)  |            |
| Proportion of fatal ischemic stroke with aspirin (%)                                            | 17.9   | (10.1-17.9) | (4, 14-16) |
| Proportion of major ischemic                                                                    | 30     | (30-41.1)   |            |

|                                                                                      |       |             |           |
|--------------------------------------------------------------------------------------|-------|-------------|-----------|
| stroke with aspirin (%)                                                              |       |             |           |
| Proportion of minor ischemic stroke with aspirin (%)                                 | 41    | (34.8-41)   |           |
| Proportion of ischemic stroke with no residual deficit with aspirin (%)              | 11    | (11-13.3)   |           |
| Relative risk of stroke per 10 years of life                                         | 1.4   | ---         | (18)      |
| Baseline rate of ICH on warfarin for patients in low bleed risk category (%/year)    | 0.497 | ---         | IBM, (10) |
| Baseline rate of ICH on warfarin for patients in medium bleed risk category (%/year) | 0.620 | ---         |           |
| Baseline rate of ICH on warfarin for patients in high bleed risk category (%/year)   | 0.887 | ---         |           |
| Relative risk of ICH per 10 years of life                                            | 1.97  | ---         | (18)      |
| Relative risk of ICH comparing aspirin to warfarin                                   | 0.51  | (0.16-1.6)  | (12)      |
| Proportion of fatal ICH with dabigatran or aspirin (%)                               | 36.4  | (28.3-45.2) | (19)      |
| Proportion of major ICH with dabigatran or aspirin (%)                               | 14.1  | (9-21.4)    |           |
| Proportion of minor ICH with dabigatran or aspirin (%)                               | 49.5  | ---         |           |
| Hazard ratio of ICH comparing brand dabigatran to warfarin                           | 0.4   | (0.27-0.6)  | (11)      |
| Baseline rate of ECH on warfarin for patients in low bleed risk category (%/year)    | 1.916 | ---         | IBM, (10) |
| Baseline rate of ECH on warfarin for patients in medium bleed risk category (%/year) | 2.390 | ---         |           |
| Baseline rate of ECH on warfarin for patients in high bleed risk category (%/year)   | 3.423 | ---         |           |

|                                                                                                                                                 |      |             |                 |
|-------------------------------------------------------------------------------------------------------------------------------------------------|------|-------------|-----------------|
| Hazard ratio of ECH comparing brand dabigatran to warfarin                                                                                      | 1.07 | (0.78-1.25) | (11)            |
| Relative risk of ECH comparing aspirin to warfarin                                                                                              | 1.14 | (0.47-2.73) | (12)            |
| Proportion of fatal ECH (%)                                                                                                                     | 1.47 | (1-4)       | (4)             |
| Baseline rate of MI on warfarin (%/year)                                                                                                        | 1.12 | (0.93-1.31) | (10)            |
| Relative risk of MI per 10 years of life                                                                                                        | 1.3  | ---         | (4, 14, 15, 17) |
| Hazard ratio of MI comparing brand dabigatran to warfarin                                                                                       | 1.31 | (0.89-1.91) | (11)            |
| Relative risk of MI comparing aspirin to warfarin                                                                                               | 1.42 | (0.84-2.39) | (12)            |
| Proportion of fatal MI (%)                                                                                                                      | 16.6 | (15.8-17.4) | (4)             |
| Relative risk of nonevent death with nonvalvular atrial fibrillation                                                                            | 1.3  | (1.12-1.62) | (20)            |
| Relative risk of nonevent death with nonvalvular atrial fibrillation and stroke                                                                 | 2.3  | (1.3-3)     | (21)            |
| Abbreviations: RIND=reversible ischemic neurological damage; ICH=intracranial hemorrhage; ECH=extracranial hemorrhage; MI=Myocardial Infarction |      |             |                 |

Table S2. The calculation of state and transition utilities

| Health state            | Calculations of state utilities (monthly utilities) |
|-------------------------|-----------------------------------------------------|
| Well with AF            | $0.994/12 = 0.08283$                                |
| RIND                    | $0.994/12 = 0.08283$                                |
| Minor stroke            | $0.994/12 - 0.24/12 = 0.06283$                      |
| Major stroke            | $0.994/12 - 0.61/12 = 0.032$                        |
| Minor ICH               | $0.998/12 - 0.24/12 = 0.06317$                      |
| Major ICH               | $0.998/12 - 0.61/12 = 0.03233$                      |
| Minor stroke on aspirin | $0.998/12 - 0.24/12 = 0.06317$                      |
| Major stroke on aspirin | $0.998/12 - 0.61/12 = 0.03233$                      |
| Stroke and ICH          | $0.998/12 - 0.61/12 = 0.03233$                      |

|                                                                                                                                                                                                          |                                                    |
|----------------------------------------------------------------------------------------------------------------------------------------------------------------------------------------------------------|----------------------------------------------------|
| MI                                                                                                                                                                                                       | $0.994/12 = 0.08283$                               |
| ECH                                                                                                                                                                                                      | $0.998/12 = 0.08317$                               |
| Death                                                                                                                                                                                                    | 0                                                  |
| <b>Transition event</b>                                                                                                                                                                                  | <b>Calculations of transition utilities (QALY)</b> |
| RIND                                                                                                                                                                                                     | -0.24                                              |
| MI                                                                                                                                                                                                       | $-0.16*(30/365.25) = -0.013141$                    |
| ECH                                                                                                                                                                                                      | $-0.16*(14/365.25) = -0.006133$                    |
| Minor bleed                                                                                                                                                                                              | $-0.16*(2/365.25) = -0.000876$                     |
| Abbreviations: AF=atrial fibrillation; RIND=reversible ischemic neurological damage; ICH=intracranial hemorrhage; ECH=extracranial hemorrhage; MI=Myocardial Infarction; QALY=quality-adjusted life year |                                                    |

### **Detailed Calculation of Transition Probabilities (Event Rate)**

#### **Stroke**

The ischemic stroke rates for patients on warfarin at each CHA<sub>2</sub>DS<sub>2</sub>-VASc score category were derived from IBM MarketScan<sup>®</sup> Databases. Stroke rates stratified by CHA<sub>2</sub>DS<sub>2</sub>-VASc score category for those receiving brand dabigatran were derived by multiplying the on-warfarin rates by the HR of ischemic stroke on dabigatran reported in RE-LY trial. Stroke rates for those on generic dabigatran were derived by multiplying the on-dabigatran (brand) rates by the HR of stroke comparing brand and generic dabigatran obtained from the PK/PD model.

#### **Bleeding events**

The overall (without stratification by HAS-BLED score) bleeding rates (minor bleeding, ICH and ECH) on warfarin were obtained from an existing clinical trial. Bleeding rates (minor bleeding, ICH and ECH) stratified by HAS-BLED score for those on warfarin were derived by multiplying the overall bleeding rates by the relative risks for bleeding overall and between each HAS-BLED score category. These relative risks were obtained from IBM MarketScan<sup>®</sup> Databases. The IBM MarketScan Database Analysis section describes in detail how the relative risks were estimated. The bleeding rates stratified by the HAS-BLED score for those on dabigatran were

derived by multiplying the on-warfarin bleeding rates stratified by HAS-BLED score by the hazard ratios of bleeding for dabigatran versus warfarin obtained from the RELY clinical trial.(11) The bleeding rates for those on generic dabigatran were derived by multiplying the on-dabigatran (brand) bleeding rates stratified by HAS-BLED score by the hazard ratio of bleeding comparing generic to brand dabigatran obtained from the PK/PD model.

### **Myocardial infarction**

On-warfarin myocardial infarction rate was obtained from clinical trial. Myocardial infarction rate for those on (brand) dabigatran was calculated by multiplying the on-warfarin rate by the hazard ratio of MI comparing warfarin to dabigatran. The myocardial infarction rate for those on generic dabigatran was calculated by multiplying the on-dabigatran (brand) rate by the hazard ratio of MI comparing generic to brand. This hazard ratio was based on the difference in hazard ratio of MI between 150 mg dabigatran versus control treatment and 110 mg dabigatran versus control treatment obtained from meta-analysis, assuming a linear relationship between dabigatran dose and MI.

### **IBM MarketScan<sup>®</sup> Database Analysis**

This section describes the analysis we conducted in IBM MarketScan<sup>®</sup> database to obtain the parameters described in the Transition Probability section. Use of MarketScan data for this study were considered exempt from review by the University of Florida Institutional Review Board.

All new users of warfarin from Oct 19, 2010 to June 30, 2015 were selected based on the national drug code (NDC). The index date is defined as the date of the first prescription. Patients were required to have one inpatient or two outpatient diagnosis of Atrial Fibrillation (AF) within 60 days before the index date and at least 12

months of continuous enrollment in the health plan before the index date. Patients with diagnosis of mitral valve disease, heart valve repair or replacement, or joint replacement during the pre-index period were excluded.

All patients were grouped into three categories based on the estimated CHA<sub>2</sub>DS<sub>2</sub>-VASc score (Low stroke risk: 2-3; Medium stroke risk: 4; High stroke risk: >=5). Patients in each subgroup were followed until the occurrence of ischemic stroke (ICD-9-CM diagnosis code, 433.x1, 434.x1 and 436) or transient ischemic attack (ICD-9-CM diagnosis code, 435.x). The stroke rates stratified by CHA<sub>2</sub>DS<sub>2</sub>-VASc score category were calculated:

$$\text{Stroke rate} = \frac{\text{Number of event (ischemic stroke or transient ischemic attack)}}{\text{Total follow up person-time (person-year)}}$$

All the bleeding rates (minor bleeding, ICH and ECH) were calculated using the same set of relative risks between overall and each HAS-BLED score category. Patients were grouped into three categories based on estimated HAS-BLED score (Low bleed risk: 0-1; Medium: 2; High: >=3). Patients were followed until the occurrence of moderate or minor bleeding events. Moderate bleeding was defined as bleeding events in inpatient or emergency department that did not meet the criteria for major bleeding (occurrence at critical sites, transfusions needed and death). Minor bleeding was defined as bleeding events treated in an outpatient setting. The overall moderate/minor bleeding rate and bleeding rate for each bleed risk subgroup were calculated:

$$\text{Bleeding rate} = \frac{\text{Number of event (moderate or minor bleeding event)}}{\text{Total follow up person-time (person-year)}}$$

The relative risks of bleeding between overall population and each individual bleed risk category were then calculated.

Patients were grouped into nine subgroups based on stroke and bleeding risk categories described earlier. Their mean age at index date and standard deviation were calculated.



Figure S1-S4 shows the result of one-way sensitivity analysis comparing brand dabigatran and extreme cases of generic dabigatran.

### Sensitivity Analysis (WTP=50,000)

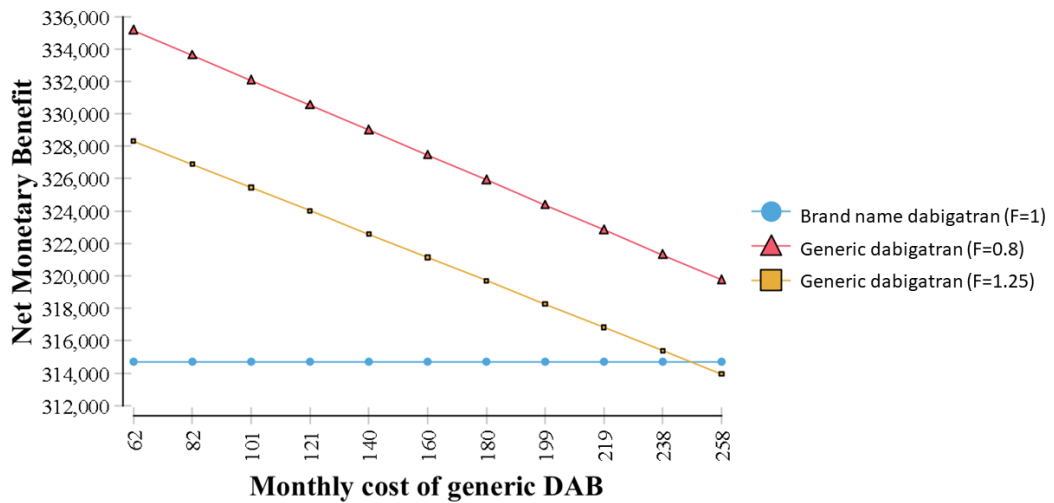

A)

### Sensitivity Analysis (WTP=100,000)

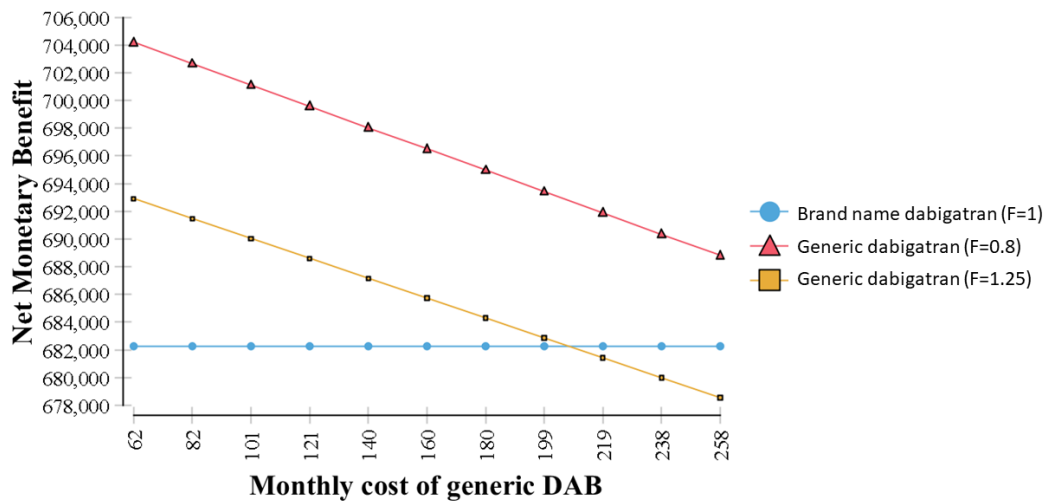

B)

Figure S1. net monetary benefit of brand and extreme cases of generic dabigatran at varying generic dabigatran cost A) using willingness-to-pay threshold of 50,000 B) using willingness-to-pay threshold of 100,000.

## Tornado Diagram – Net Monetary Benefits (WTP=50,000)

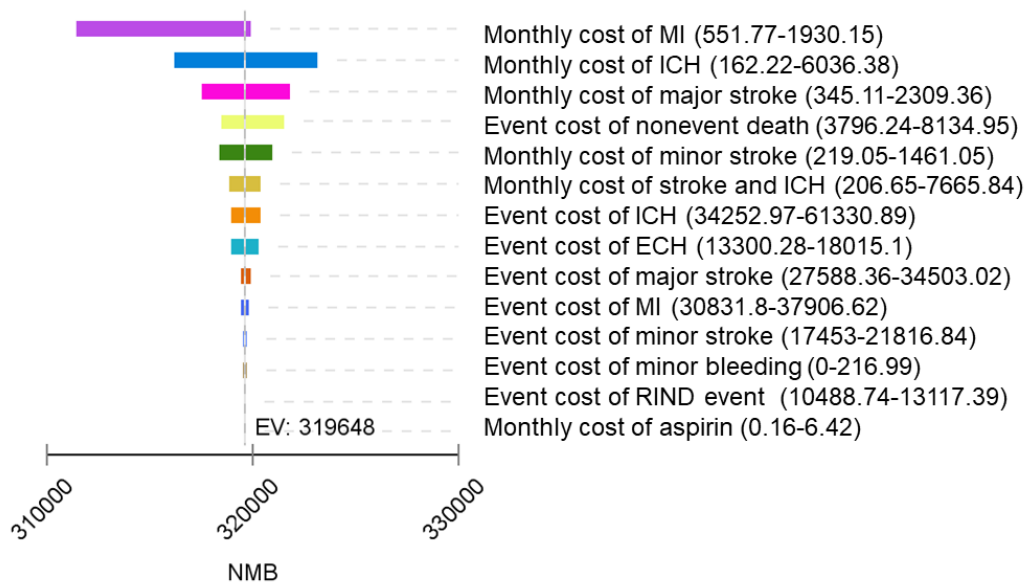

## Tornado Diagram – Net Monetary Benefits (WTP=100,000)

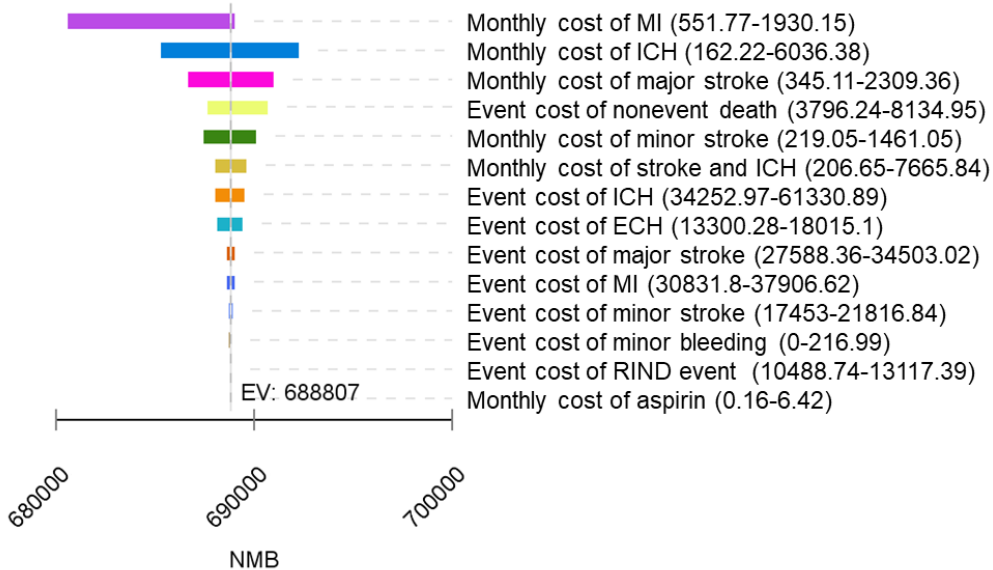

A)

Figure S2. Tornado diagram of net monetary benefit at varying event and monthly cost comparing brand and extreme cases of generic dabigatran A) using willingness-to-pay threshold of 50,000 B) using willingness-to-pay threshold of 100,000.

### Tornado Diagram – Net Monetary Benefits (WTP=50,000)

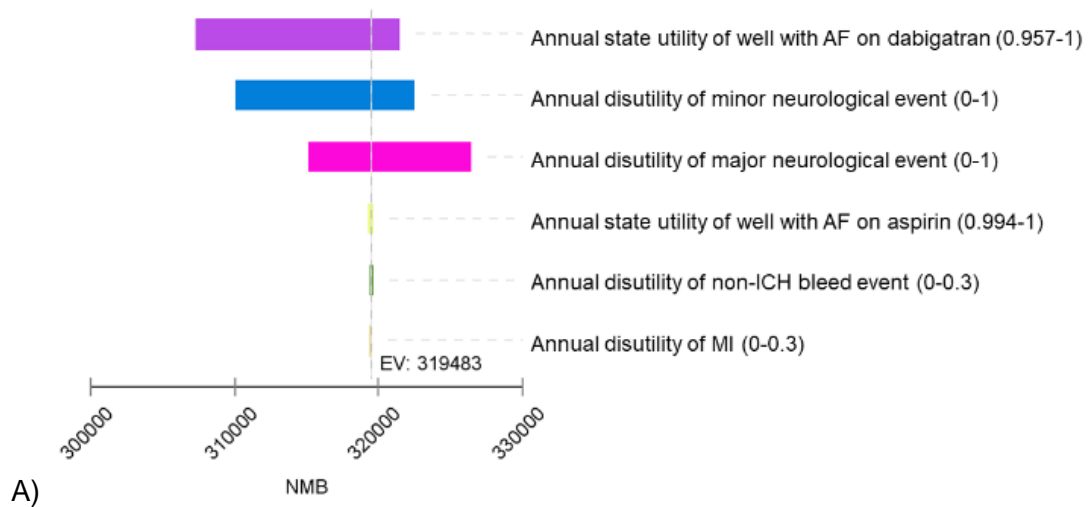

### Tornado Diagram – Net Monetary Benefits (WTP=100,000)

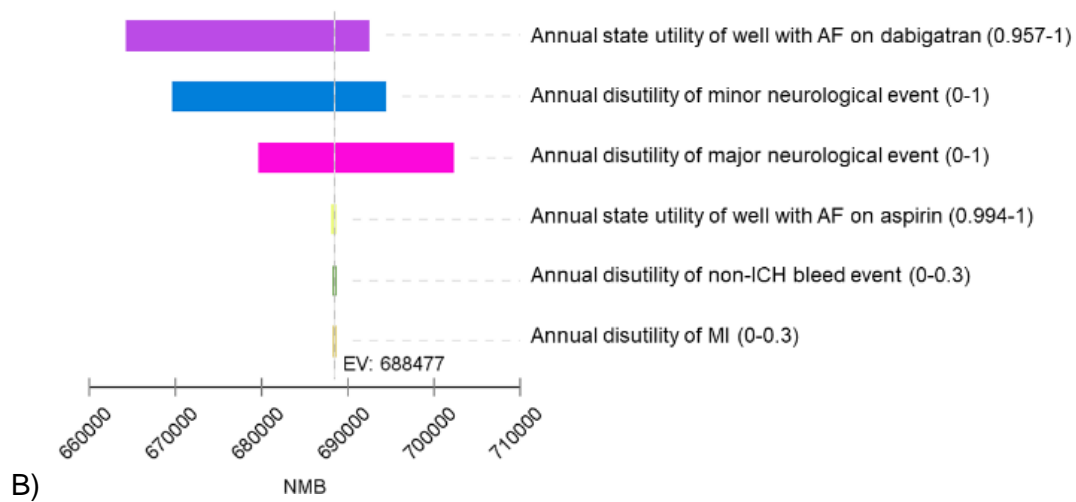

Figure S3. Tornado diagram of net monetary benefit at varying utilities comparing brand and extreme cases of generic dabigatran A) using willingness-to-pay threshold of 50,000 B) using willingness-to-pay threshold of 100,000.

## Tornado Diagram- Net Monetary Benefits (WTP=50,000)

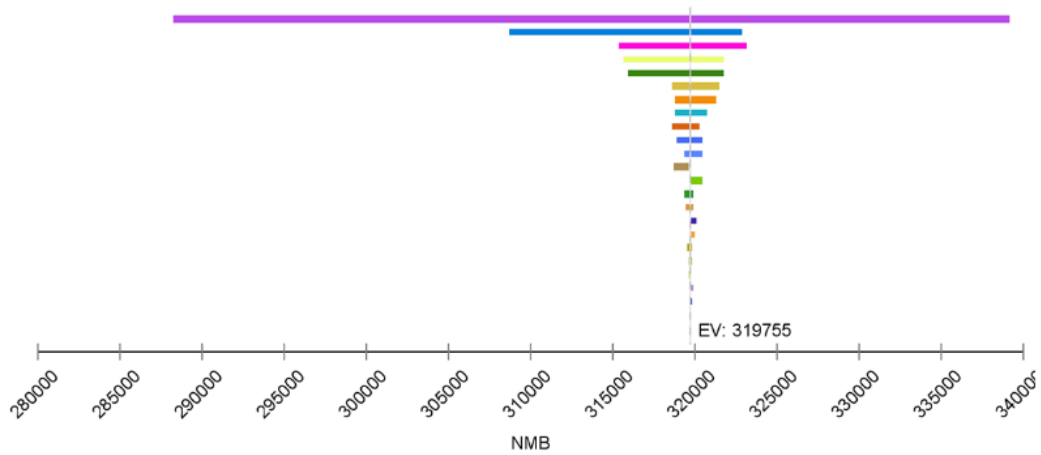

- RR of nonevent death with nonvalvular AF (1.12-1.61)
  - HR of ICH comparing brand dabigatran to warfarin (0.27-0.6)
  - HR of stroke comparing brand dabigatran to warfarin (0.6-0.98)
  - HR of MI comparing dabigatran to warfarin (0.89-1.91)
  - RR of ICH comparing aspirin to warfarin (0.16-1.6)
  - RR of stroke comparing aspirin to warfarin (1.59-2.7)
  - Baseline rate of MI on warfarin (0.0093-0.0131)
  - RR of MI comparing aspirin to warfarin (0.84-2.39)
  - Proportion of fatal ECH (0.01-0.04)
  - HR of ECH comparing brand dabigatran to warfarin (0.78-1.25)
  - RR of ECH comparing aspirin to warfarin (0.47-2.73)
  - RR of nonevent death AF and stroke (1.3-3)
  - Proportion of ischemic stroke with no residual deficit with dabigatran (0.091-0.133)
  - Proportion of fatal MI (0.158-0.174)
  - Proportion of major ICH (0.09-0.214)
  - Proportion of ischemic stroke with no residual deficit with aspirin (0.11-0.133)
  - Proportion of fatal ischemic stroke with aspirin (0.101-0.179)
  - Proportion of fatal ICH with dabigatran or aspirin (0.283-0.452)
  - Proportion of major ischemic stroke with aspirin (0.3-0.411)
  - Proportion of minor ischemic stroke with dabigatran (0.09-0.214)
  - Proportion of fatal ischemic stroke with dabigatran (0.082-0.101)
  - Proportion of minor ischemic stroke with aspirin (0.348-0.41)
  - Proportion of major ischemic stroke with dabigatran (0.402-0.417)
  - RR of minor bleeding comparing aspirin to warfarin (0.32-1.22)
  - HR of minor bleeding comparing dabigatran to warfarin (0.85-0.97)
- A)

### Tornado Diagram- Net Monetary Benefits (WTP=100,000)

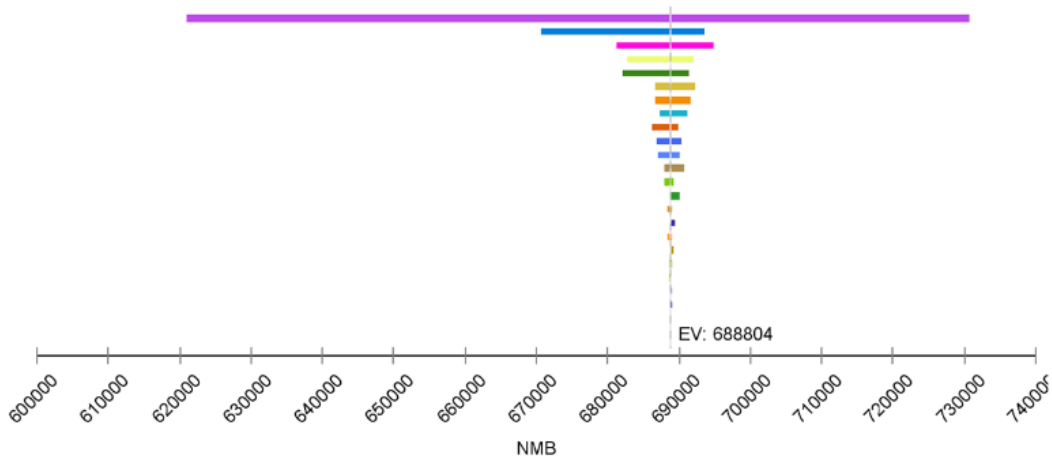

- RR of nonevent death with nonvalvular AF (1.12-1.61)
- HR of ICH comparing brand dabigatran to warfarin (0.27-0.6)
- HR of stroke comparing brand dabigatran to warfarin (0.6-0.98)
- RR of ICH comparing aspirin to warfarin (0.16-1.6)
- HR of MI comparing dabigatran to warfarin (0.89-1.91)
- RR of stroke comparing aspirin to warfarin (1.59-2.7)
- RR of nonevent death AF and stroke (1.3-3)
- Baseline rate of MI on warfarin (0.0093-0.0131)
- RR of MI comparing aspirin to warfarin (0.84-2.39)
- Proportion of fatal ECH (0.01-0.04)
- HR of ECH comparing brand dabigatran to warfarin (0.78-1.25)
- RR of ECH comparing aspirin to warfarin (0.47-2.73)
- Proportion of fatal MI (0.158-0.174)
- Proportion of ischemic stroke with no residual deficit with dabigatran (0.091-0.133)
- Proportion of major ICH (0.09-0.214)
- Proportion of ischemic stroke with no residual deficit with aspirin (0.11-0.133)
- Proportion of fatal ICH with dabigatran or aspirin (0.283-0.452)
- Proportion of fatal ischemic stroke with aspirin (0.101-0.179)
- Proportion of major ischemic stroke with aspirin (0.3-0.411)
- Proportion of minor ischemic stroke with dabigatran (0.09-0.214)
- Proportion of fatal ischemic stroke with dabigatran (0.082-0.101)
- Proportion of minor ischemic stroke with aspirin (0.348-0.41)
- Proportion of major ischemic stroke with dabigatran (0.402-0.417)
- RR of minor bleeding comparing aspirin to warfarin (0.32-1.22)
- HR of minor bleeding comparing dabigatran to warfarin (0.85-0.97)

B)

Figure S4. Tornado diagram of net monetary benefit at varying transition probabilities comparing brand and extreme cases of generic dabigatran A) using willingness-to-pay threshold of 50,000 B) using willingness-to-pay threshold of 100,000.

Figure S5-S7 shows the result of one-way sensitivity analysis comparing brand dabigatran to F=1.25 generic dabigatran.

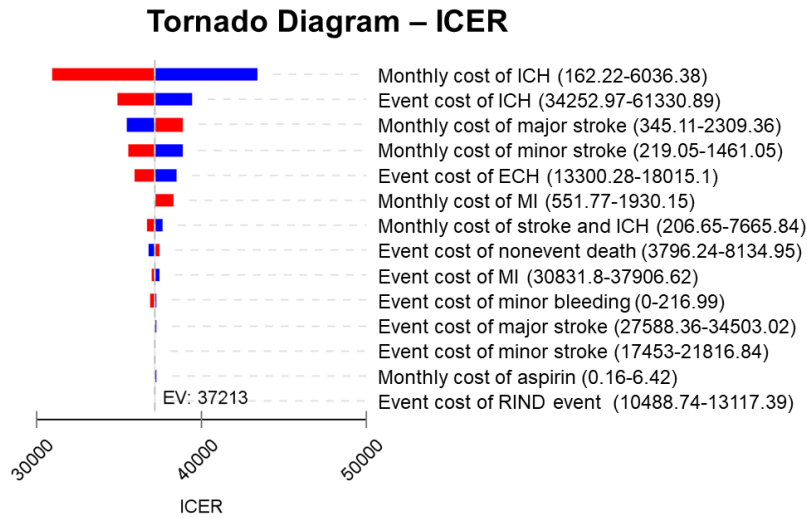

Figure S5. Tornado diagram of incremental cost-effectiveness ratio comparing brand and F=1.25 generic dabigatran at varying event and monthly.

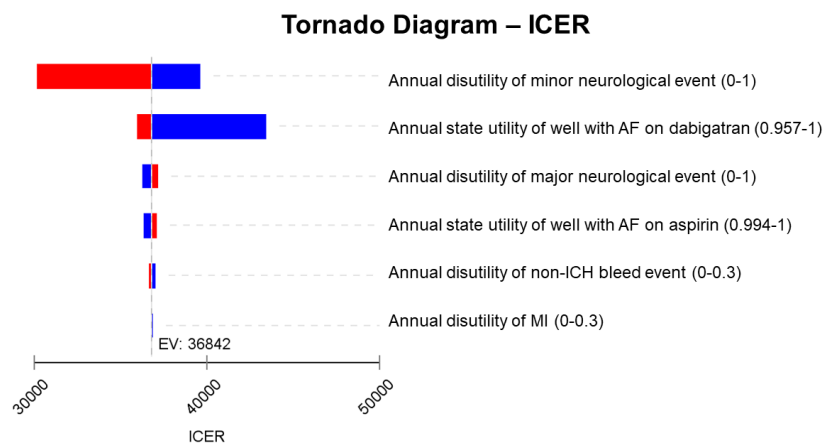

Figure S6. Tornado diagram of incremental cost-effectiveness ratio comparing brand and F=1.25 generic dabigatran at varying utilities.

### Tornado Diagram- ICER

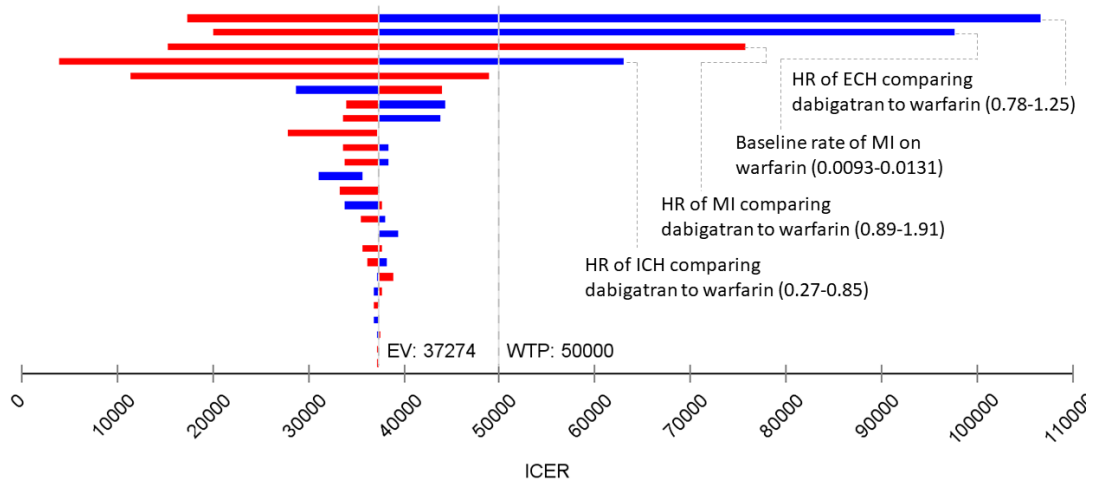

Figure S7. Tornado diagram of incremental cost-effectiveness ratio comparing brand and F=1.25 generic dabigatran at varying transition probabilities.

Figure S8-S11 shows the result of one-way sensitivity analysis comparing brand dabigatran and less extreme cases of generic dabigatran.

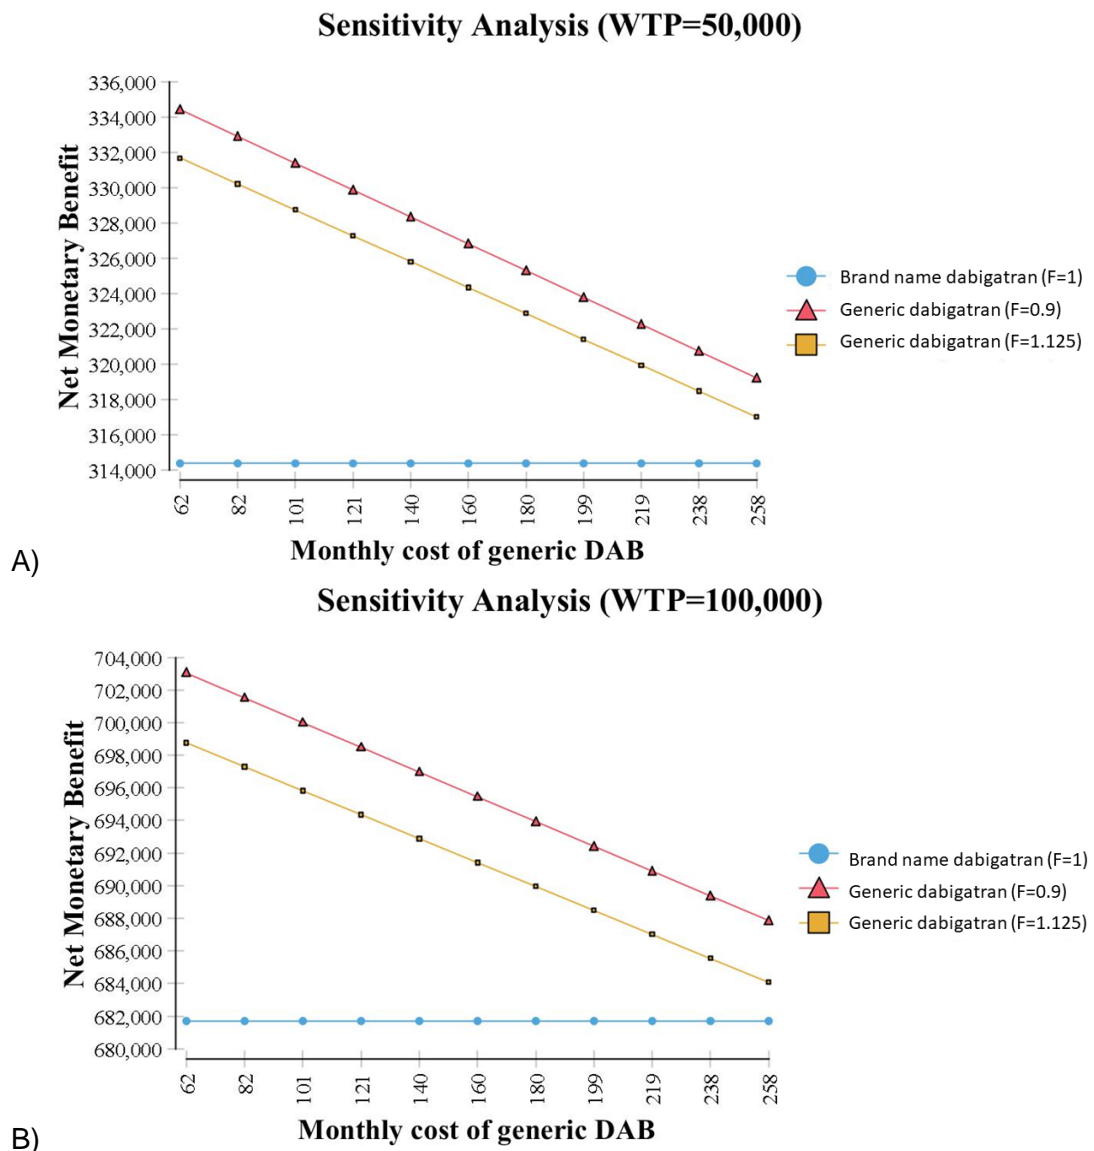

Figure S8. Net monetary benefit of brand and less extreme cases of generic dabigatran at varying generic dabigatran cost A) using willingness-to-pay threshold of 50,000 B) using willingness-to-pay threshold of 100,000.



## Tornado Diagram – Net Monetary Benefit

(WTP=50,000)

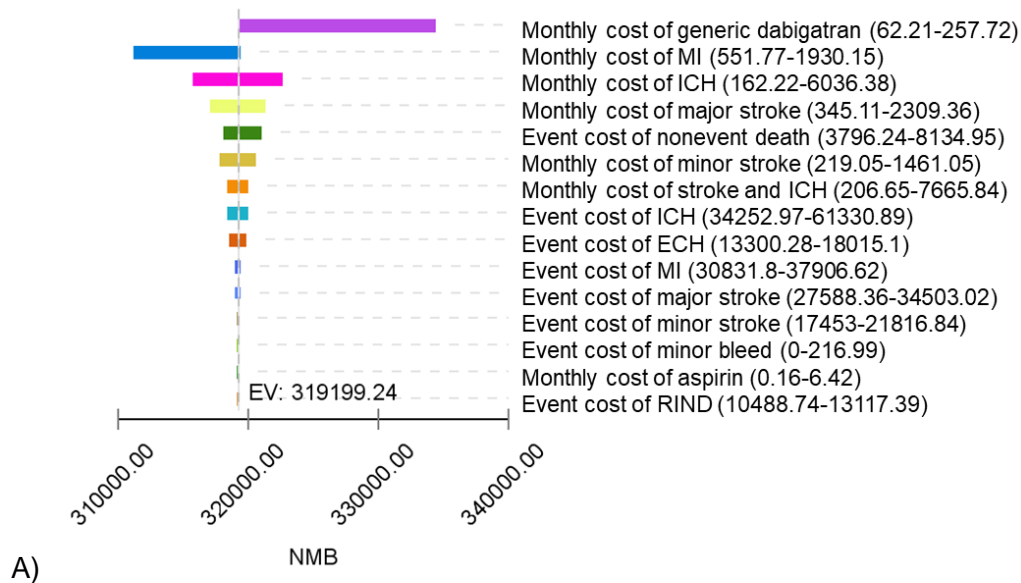

## Tornado Diagram – Net Monetary Benefit

(WTP=100,000)

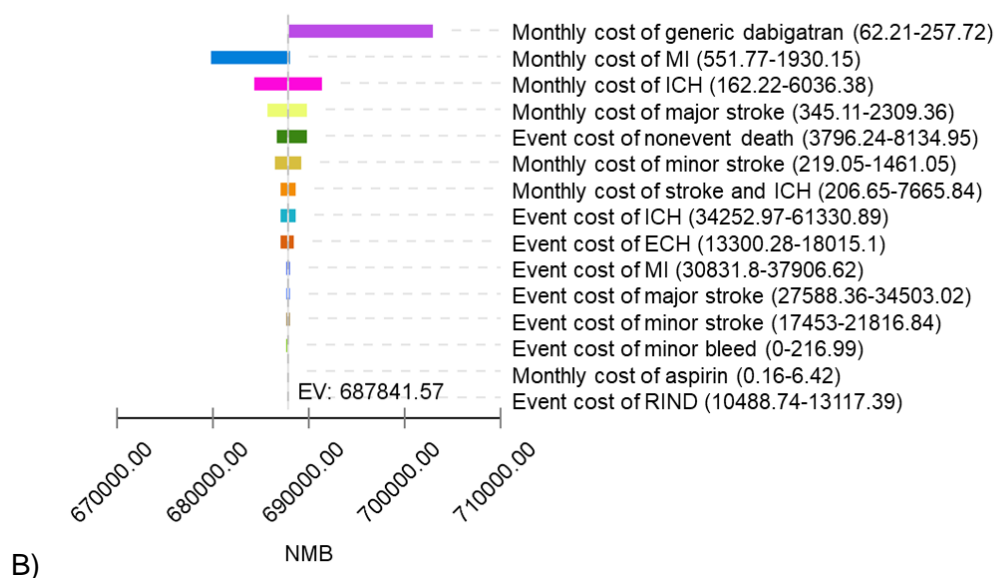

Figure S9. Tornado diagram of Net monetary benefit comparing brand and less extreme cases of generic dabigatran at varying event and monthly cost A) using willingness-to-pay threshold of 50,000 B) using willingness-to-pay threshold of 100,000.

**Tornado Diagram – Net Monetary Benefit  
(WTP=50,000)**

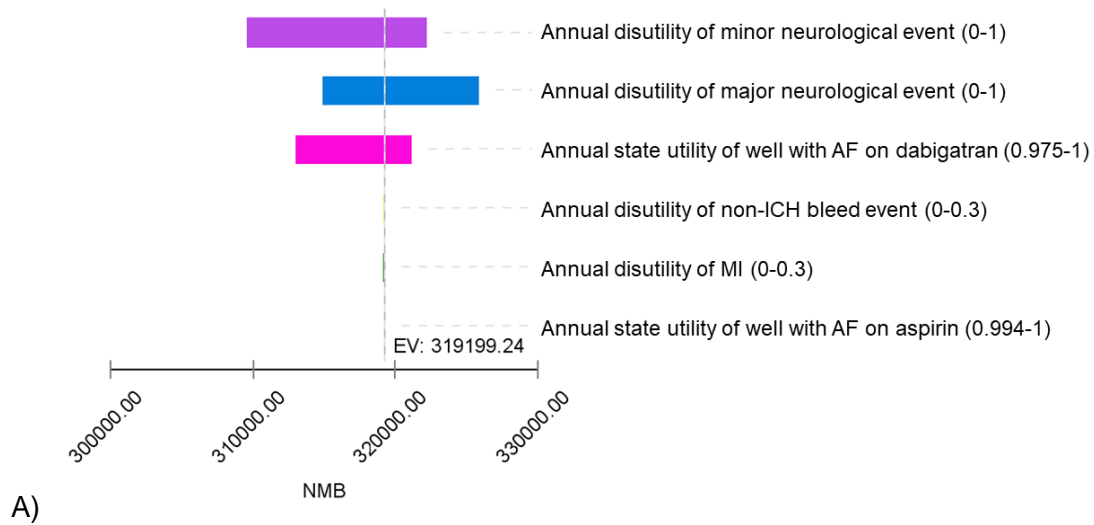

**Tornado Diagram – Net Monetary Benefit  
(WTP=100,000)**

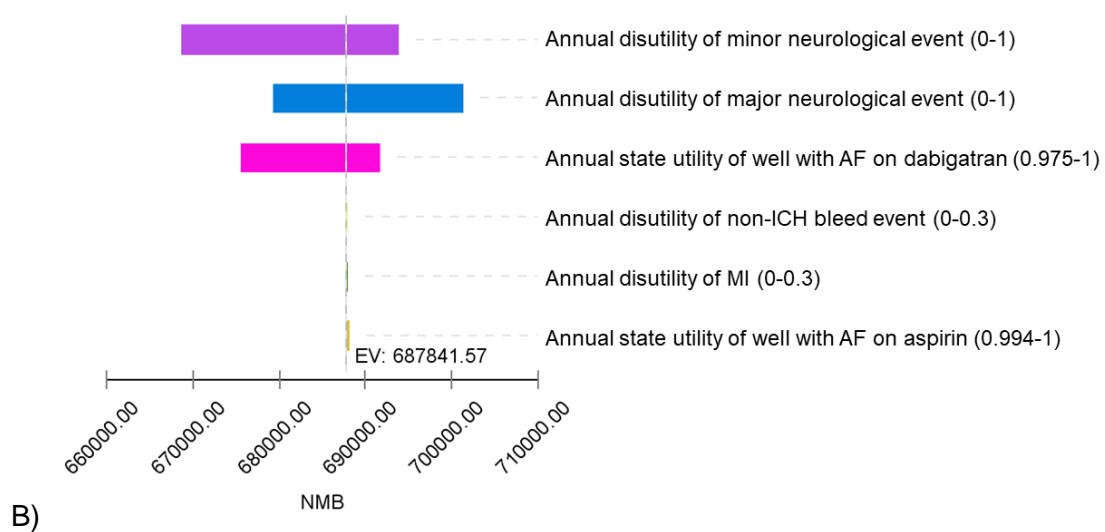

Figure S10. Tornado diagram of net monetary benefit comparing brand and less extreme cases of generic dabigatran at varying utilities A) using willingness-to-pay threshold of 50,000 B) using willingness-to-pay threshold of 100,000.

## Tornado Diagram – Net Monetary Benefit (WTP=50,000)

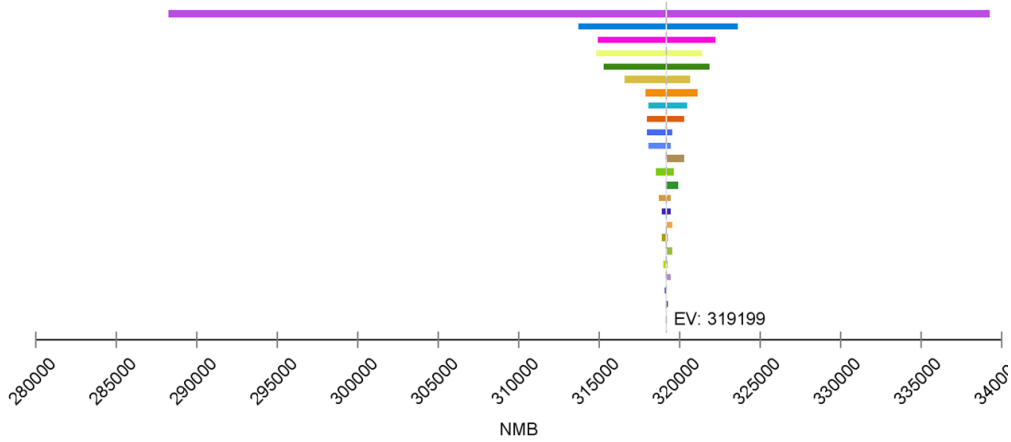

- RR of nonevent death with nonvalvular AF (1.12-1.61)
- HR of ICH comparing brand dabigatran to warfarin (0.27-0.6)
- HR of stroke comparing brand dabigatran to warfarin (0.6-0.98)
- RR of ICH comparing brand aspirin to warfarin (0.16-1.6)
- HR of MI comparing dabigatran to warfarin (0.89-1.91)
- Baseline rate of MI on warfarin (0.0093-0.0131)
- RR of stroke comparing aspirin to warfarin (1.59-2.7)
- RR of MI comparing aspirin to warfarin (0.84-2.39)
- HR of ECH comparing brand dabigatran to warfarin (0.78-1.25)
- Proportion of fatal ECH(0.01-0.04)
- RR of nonevent death AF and stroke (1.3-3)
- Proportion of ischemic stroke with no residual deficit with dabigatran (0.091-0.133)
- Proportion of fatal ICH with dabigatran or aspirin (0.283-0.452)
- RR of ECH comparing aspirin to warfarin (0.47-2.73)
- Proportion of fatal MI (0.158-0.174)
- Proportion of major ICH with dabigatran or aspirin (0.09-0.214)
- Proportion of minor ischemic stroke with dabigatran (0.348-0.425)
- Proportion of fatal ischemic stroke with aspirin (0.101-0.179)
- Proportion of ischemic stroke with no residual deficit with aspirin (0.11-0.133)
- Proportion of major stroke with aspirin (0.3-0.411)
- Proportion of fatal stroke with dabigatran (0.082-0.101)
- Proportion of minor stroke with aspirin (0.348-0.41)
- Proportion of major stroke with dabigatran (0.402-0.417)
- RR of minor bleed comparing aspirin to warfarin (0.32-1.22)
- HR of minor bleed comparing dabigatran to warfarin (0.85-0.97)

A)

**Tornado Diagram – Net Monetary Benefit  
(WTP=100,000)**

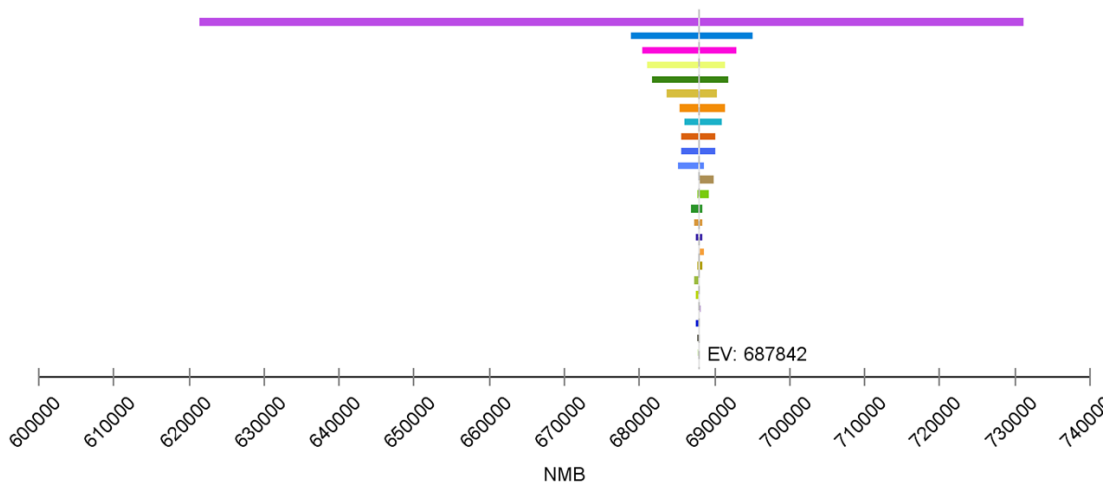

- RR of nonevent death with nonvalvular AF (1.12-1.61)
- HR of ICH comparing brand dabigatran to warfarin (0.27-0.6)
- HR of stroke comparing brand dabigatran to warfarin (0.6-0.98)
- RR of ICH comparing brand aspirin to warfarin (0.16-1.6)
- HR of MI comparing dabigatran to warfarin (0.89-1.91)
- Baseline rate of MI on warfarin (0.0093-0.0131)
- RR of stroke comparing aspirin to warfarin (1.59-2.7)
- RR of nonevent death AF and stroke (1.3-3)
- HR of ECH comparing brand dabigatran to warfarin (0.78-1.25)
- RR of MI comparing aspirin to warfarin (0.84-2.39)
- Proportion of fatal ECH (0.01-0.04)
- Proportion of ischemic stroke with no residual deficit with dabigatran (0.091-0.133)
- RR of ECH comparing aspirin to warfarin (0.47-2.73)
- Proportion of fatal MI (0.158-0.174)
- Proportion of fatal ICH with dabigatran or aspirin (0.283-0.452)
- Proportion of major ICH with dabigatran or aspirin (0.09-0.214)
- Proportion of minor ischemic stroke with dabigatran (0.348-0.425)
- Proportion of ischemic stroke with no residual deficit with aspirin (0.11-0.133)
- Proportion of major stroke with aspirin (0.3-0.411)
- Proportion of fatal ischemic stroke with aspirin (0.101-0.179)
- Proportion of fatal stroke with dabigatran (0.082-0.101)
- Proportion of minor stroke with aspirin (0.348-0.41)
- Proportion of major stroke with dabigatran (0.402-0.417)
- RR of minor bleed comparing aspirin to warfarin (0.32-1.22)
- HR of minor bleed comparing dabigatran to warfarin (0.85-0.97)

B)

Figure S11. Tornado diagram of net monetary benefit comparing brand and less extreme cases of generic dabigatran at varying transition probabilities A) using willingness-to-pay threshold of 50,000 B) using willingness-to-pay threshold of 100,000.

Figure S12-S14 shows the result of one-way sensitivity analysis comparing brand dabigatran and F=1.125 generic dabigatran.

### Sensitivity Analysis (WTP=50,000)

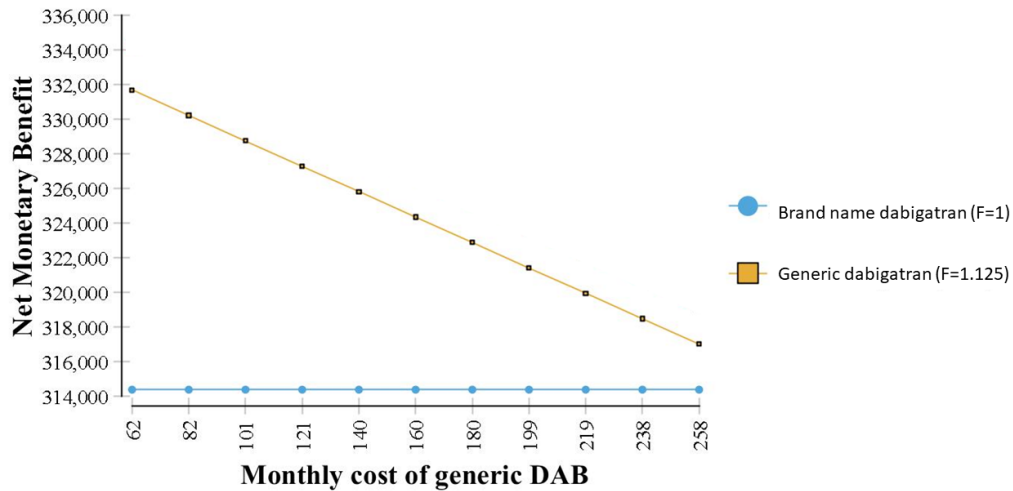

A)

### Sensitivity Analysis (WTP=100,000)

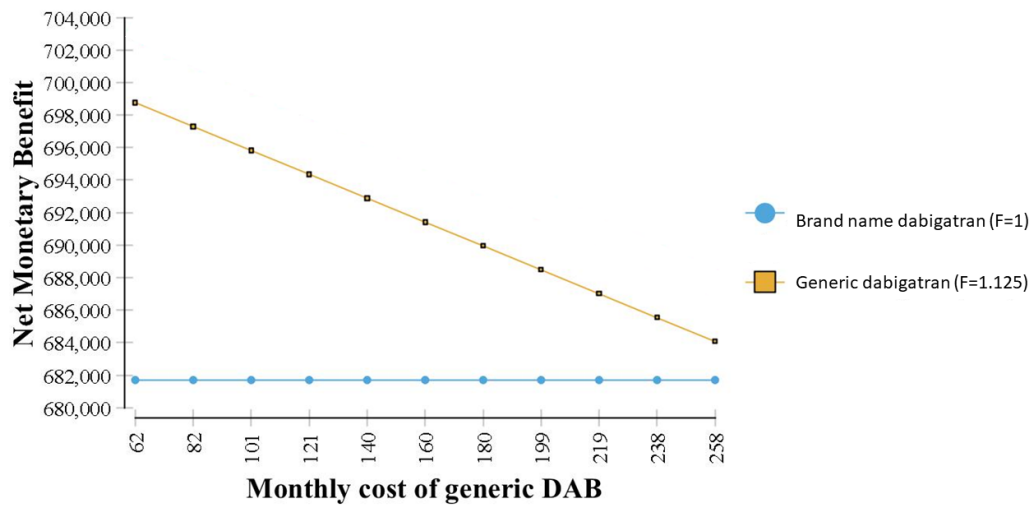

B)

Figure S12. Net monetary benefit at varying cost of generic dabigatran comparing brand dabigatran and F=1.125 generic dabigatran A) using willingness-to-pay threshold of 50,000 B) using willingness-to-pay threshold of 100,000.

## Tornado Diagram – ICER

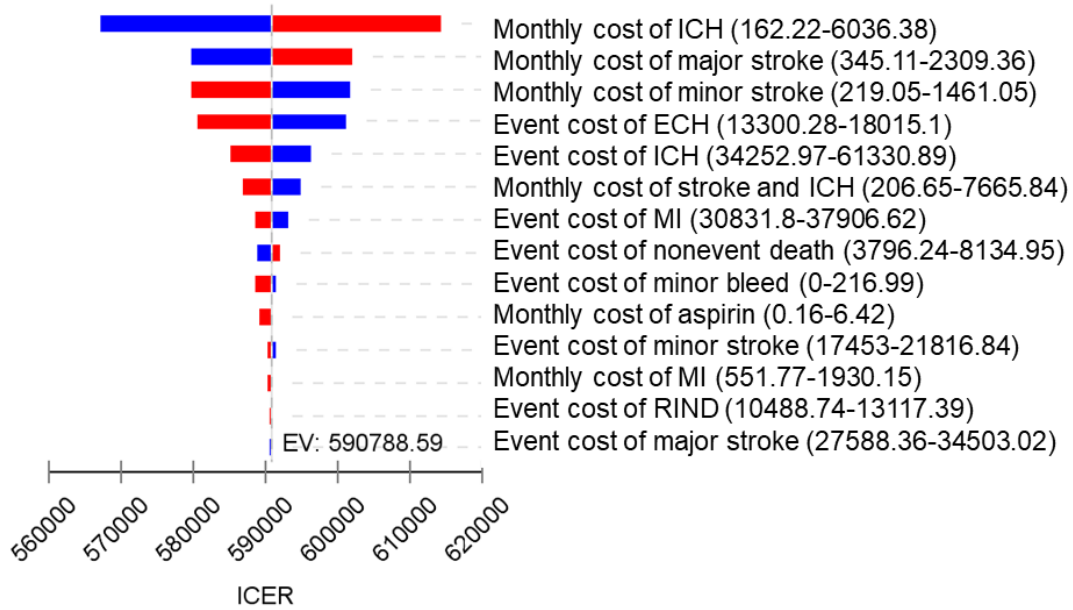

Figure S13. Tornado diagram of incremental cost-effectiveness ratio at varying event and monthly comparing brand dabigatran and F=1.125 generic dabigatran

## Tornado Diagram – ICER

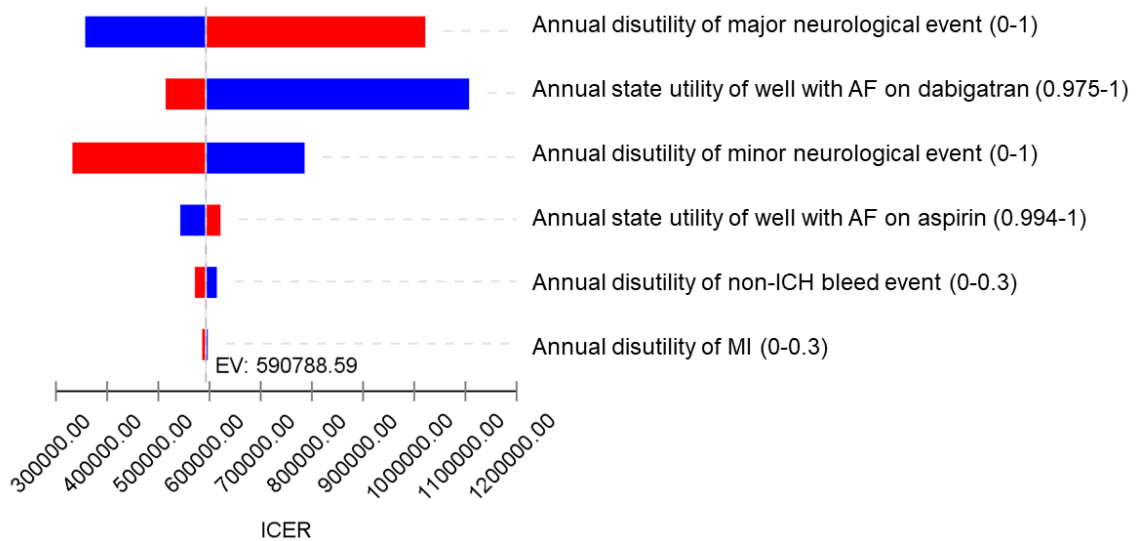

Figure S14. Tornado diagram of incremental cost-effectiveness ratio at varying utilities comparing brand dabigatran and F=1.125 generic dabigatran

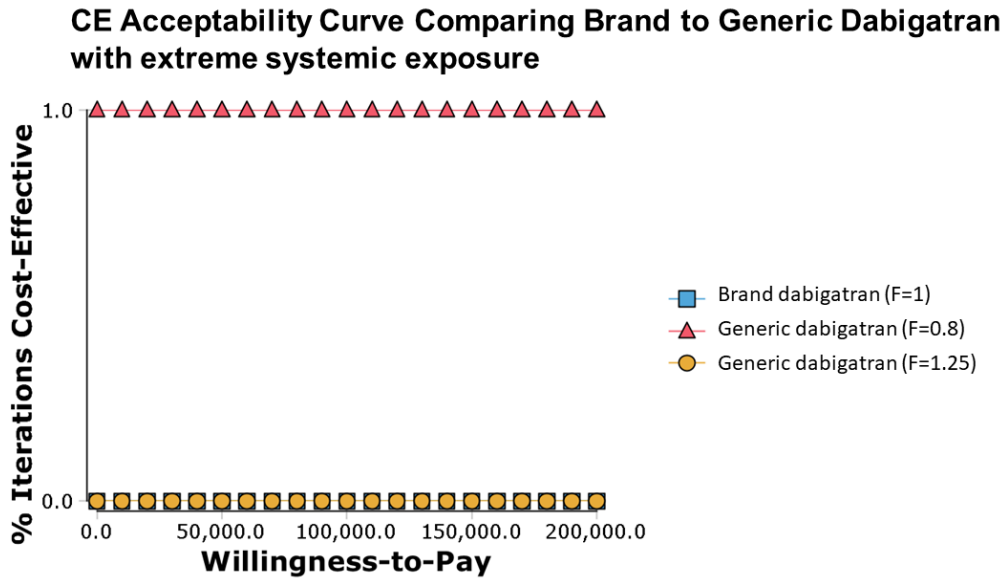

Figure S15. Result of probability sensitivity analysis. Cost-effectiveness (CE) acceptability curve (probability that a treatment will be cost-effective at varying willingness-to-pay thresholds)

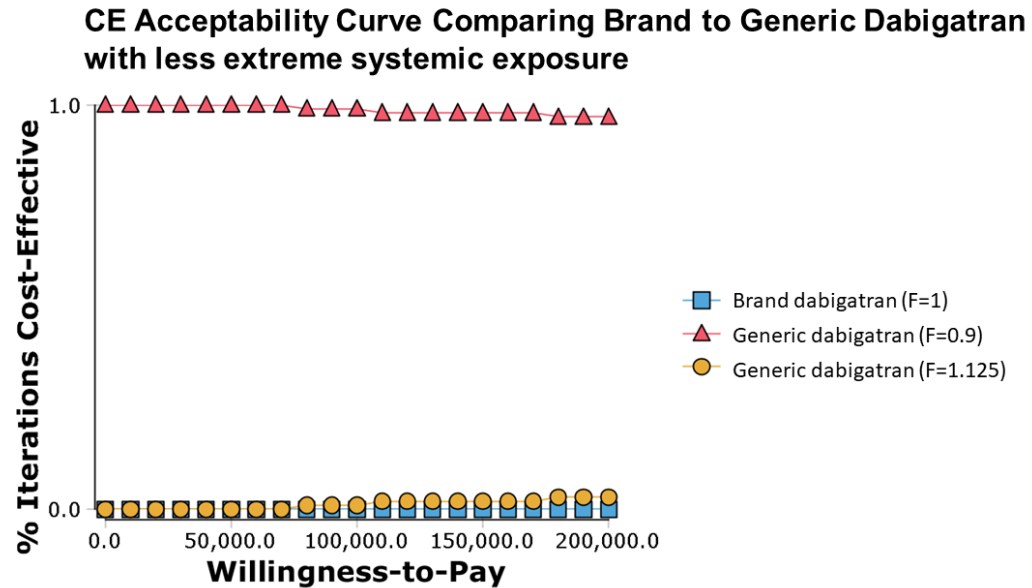

Figure S16. Result of probability sensitivity analysis. Cost-effectiveness (CE) acceptability curve (probability that a treatment will be cost-effective at varying willingness-to-pay thresholds)

## Reference

- (1) *Pharmacy drug pricing. National Average Drug Acquisition Costs. Medicaid Web site.*  
<<https://data.medicare.gov/Drug-Pricing-and-Payment/NADAC-National-Average-Drug-Acquisition-Cost-/a4y5-998d/data>>. Accessed December 2018.
- (2) *Medicaid drug rebate program. Medicaid Web site.*  
<<http://www.medicare.gov/Medicare-CHIP-Program-Information/By-Topics/Benefits/Prescription-Drugs/Medicare-Drug-Rebate-Program.html>>. Accessed December 2018.
- (3) Dave, C.V., Hartzema, A. & Kesselheim, A.S. Prices of Generic Drugs Associated with Numbers of Manufacturers. *N Engl J Med* **377**, 2597-8 (2017).
- (4) Lee, S., Anglade, M.W., Pham, D., Pisacane, R., Kluger, J. & Coleman, C.I. Cost-effectiveness of rivaroxaban compared to warfarin for stroke prevention in atrial fibrillation. *Am J Cardiol* **110**, 845-51 (2012).
- (5) Forrester, S.H., Devine, E.B. & Sullivan, S.D. Estimating The Inpatient And Outpatient Costs Of Atrial Fibrillation And Associated Adverse Events. *Value in Health* **17**, A109 (2014).
- (6) Krejczyk, M., Harenberg, J., Marx, S., Obermann, K., Frolich, L. & Wehling, M. Comparison of cost-effectiveness of anticoagulation with dabigatran, rivaroxaban and apixaban in patients with non-valvular atrial fibrillation across countries. *J Thromb Thrombolysis* **37**, 507-23 (2014).
- (7) Gage, B.F., Cardinali, A.B. & Owens, D.K. The effect of stroke and stroke prophylaxis with aspirin or warfarin on quality of life. *Arch Intern Med* **156**, 1829-36 (1996).
- (8) Thomson, R., Parkin, D., Eccles, M., Sudlow, M. & Robinson, A. Decision analysis and guidelines for anticoagulant therapy to prevent stroke in patients with atrial fibrillation. *Lancet* **355**, 956-62 (2000).
- (9) Sullivan, P.W. & Ghushchyan, V. Preference-Based EQ-5D index scores for chronic conditions in the United States. *Med Decis Making* **26**, 410-20 (2006).
- (10) Patel, M.R. *et al.* Rivaroxaban versus warfarin in nonvalvular atrial fibrillation. *N Engl J Med* **365**, 883-91 (2011).



- (11) Connolly, S.J. *et al.* Dabigatran versus Warfarin in Patients with Atrial Fibrillation. *New England Journal of Medicine* **361**, 1139-51 (2009).
- (12) Roskell, N.S., Lip, G.Y., Noack, H., Clemens, A. & Plumb, J.M. Treatments for stroke prevention in atrial fibrillation: a network meta-analysis and indirect comparisons versus dabigatran etexilate. *Thromb Haemost* **104**, 1106-15 (2010).
- (13) van Walraven, C. *et al.* Oral anticoagulants vs aspirin in nonvalvular atrial fibrillation: an individual patient meta-analysis. *Jama* **288**, 2441-8 (2002).
- (14) Lee, S., Mullin, R., Blazawski, J. & Coleman, C.I. Cost-effectiveness of apixaban compared with warfarin for stroke prevention in atrial fibrillation. *PLoS One* **7**, e47473 (2012).
- (15) O'Brien, C.L. & Gage, B.F. Costs and effectiveness of ximelagatran for stroke prophylaxis in chronic atrial fibrillation. *Jama* **293**, 699-706 (2005).
- (16) Lee, S., Anglade, M.W., Meng, J., Hagstrom, K., Kluger, J. & Coleman, C.I. Cost-effectiveness of apixaban compared with aspirin for stroke prevention in atrial fibrillation among patients unsuitable for warfarin. *Circ Cardiovasc Qual Outcomes* **5**, 472-9 (2012).
- (17) Freeman, J.V. *et al.* Cost-effectiveness of dabigatran compared with warfarin for stroke prevention in atrial fibrillation. *Ann Intern Med* **154**, 1-11 (2011).
- (18) Ariesen, M.J., Claus, S.P., Rinkel, G.J. & Algra, A. Risk factors for intracerebral hemorrhage in the general population: a systematic review. *Stroke* **34**, 2060-5 (2003).
- (19) Hylek, E.M. & Singer, D.E. Risk factors for intracranial hemorrhage in outpatients taking warfarin. *Ann Intern Med* **120**, 897-902 (1994).
- (20) Dries, D.L., Exner, D.V., Gersh, B.J., Domanski, M.J., Waclawiw, M.A. & Stevenson, L.W. Atrial fibrillation is associated with an increased risk for mortality and heart failure progression in patients with asymptomatic and symptomatic left ventricular systolic dysfunction: a retrospective analysis of the SOLVD trials. Studies of Left Ventricular Dysfunction. *J Am Coll Cardiol* **32**, 695-703 (1998).
- (21) Dennis, M.S., Burn, J.P., Sandercock, P.A., Bamford, J.M., Wade, D.T. & Warlow, C.P. Long-term survival after first-ever stroke: the Oxfordshire Community Stroke Project. *Stroke* **24**, 796-800 (1993).
